# Supplementary material for: Concise Review: Molecular Cytogenetics and Quality Control: Clinical Guardians for Pluripotent Stem Cells
Source: PubMed Central journal article supplement — Stem Cells Transl Med. 2018 Sep 14;7(12):867–75. doi: 10.1002/sctm.18-0087 (PMC6265634; doi:10.1002/sctm.18-0087), 2018-09-14
Supplement: SCT3-7-867-s001.pdf [file SCT3-7-867-s001.pdf]

**Supplementary Table 1.** Summary of genomic aberrations that can occur during prolonged culturing for both human embryonic stem cells and induced pluripotent stem cells.

| <b>Genomic Aberrations</b>                                                    | <b>ESCs</b> | <b>iPSCs</b> | <b>References</b>    |
|-------------------------------------------------------------------------------|-------------|--------------|----------------------|
| Trisomy 12 or amplification of 12p                                            | +           | +            | [21, 22, 29, 33, 34] |
| Trisomy X                                                                     | +           | +            | [21]                 |
| Trisomy 17                                                                    | +           | -            | [21, 26, 29, 83]     |
| Isodicentric X chromosome                                                     | +           | -            | [35]                 |
| Amplification of 20q11.21                                                     | +           | +            | [30, 31, 33]         |
| Deletions of 15q11.2, 18q12.1, 22q11.21                                       | +           | -            | [27, 31]             |
| Deletions of 8q24.3, 17q21.1                                                  | -           | +            | [54]                 |
| Amplifications of 1p36.13, 1p36.33, 2p11.2, 7q35, 14q32.32, 21q11.2, 22q11.22 | +           | -            | [27]                 |
| Amplification of 1q31.3                                                       | -           | +            | [54]                 |
| Trisomy 8 and Trisomy 20q                                                     | +           | +            | [32]                 |
| LOH of 16q                                                                    | +           | -            | [27]                 |

LOH = Loss of heterozygosity

**Supplementary Table 2.** Comparison of methods for evaluating the genomic integrity of pluripotent stem cells.

| <b>Method</b>                        | <b>Advantages</b>                                                                                                                                                                                                       | <b>Disadvantages</b>                                                                                                                                                                     |
|--------------------------------------|-------------------------------------------------------------------------------------------------------------------------------------------------------------------------------------------------------------------------|------------------------------------------------------------------------------------------------------------------------------------------------------------------------------------------|
| GTG karyotyping                      | <ul style="list-style-type: none"> <li>• Detects gross abnormalities quickly</li> <li>• Can detect mosaicism and structural aberrations or inversions</li> </ul>                                                        | <ul style="list-style-type: none"> <li>• Limited to the detection of larger chromosomal aberrations (&gt;5 Mb)</li> <li>• Cannot detect functions of affected genes</li> </ul>           |
| FISH and SKY                         | <ul style="list-style-type: none"> <li>• Identify structural chromosomal aberrations</li> </ul>                                                                                                                         | <ul style="list-style-type: none"> <li>• Limited to the detection of larger chromosomal aberrations (&gt;2 Mb)</li> <li>• Cannot detect functions of affected genes</li> </ul>           |
| CGH and SNP arrays                   | <ul style="list-style-type: none"> <li>• Highly sensitive</li> <li>• Can detect small regions of changes (&gt;25 Kb)</li> <li>• Can detect mosaicism</li> <li>• SNP arrays can detect loss of heterozygosity</li> </ul> | <ul style="list-style-type: none"> <li>• Expensive</li> <li>• Cannot detect functions of affected genes</li> <li>• Samples can only be compared when run on the same platform</li> </ul> |
| Whole genome sequencing              | <ul style="list-style-type: none"> <li>• Highly sensitive</li> <li>• Can detect single base changes</li> <li>• Can detect mosaicism</li> </ul>                                                                          | <ul style="list-style-type: none"> <li>• Expensive</li> <li>• Cannot detect functions of affected genes</li> <li>• Samples can only be compared when run on the same platform</li> </ul> |
| Global gene expression meta-analysis | <ul style="list-style-type: none"> <li>• Can detect the function of affected genes</li> </ul>                                                                                                                           | <ul style="list-style-type: none"> <li>• Limited to the detection of larger chromosomal aberrations (&gt;10 Mb)</li> <li>• Cannot detect mosaicism</li> </ul>                            |

CGH = Comparative genomic hybridization

FISH = Fluorescent in situ hybridization

SKY = Spectral karyotyping

SNP = Single nucleotide polymorphism
